# Supplementary material
Source: MDPI journal article supplement (https://www.mdpi.com/2306-5729/3/4/65)
Supplement: s1 [file s1]

## Sheet: Info
Participant No.	Gender	Race	Year of Birth	Experience with Acupuncture
1	F	Chinese	1997	No
2	M	Chinese	1997	Yes
3	F	Chinese	1997	Yes
4	F	Chinese	1997	Yes
5	M	Chinese	1998	Yes
6	M	Chinese	1995	Yes
7	F	Chinese	1997	Yes
8	M	Chinese	1996	Yes
9	M	Chinese	1996	No
10	M	Chinese	1994	No
11	M	Chinese	1997	Yes
12	F	Chinese	1997	Yes
13	M	Chinese	1997	Yes
14	F	Chinese	1997	Yes
15	F	Chinese	1997	Yes
16	F	Chinese	1996	Yes
17	M	Chinese	1997	Yes
18	F	Chinese	1998	No
19	M	Chinese	1996	Yes
20	F	Chinese	1998	Yes
21	M	Chinese	1995	Yes
22	M	Chinese	1997	Yes
23	F	Chinese	1997	Yes
24	F	Chinese	1996	Yes
25	F	Chinese	1997	Yes
26	M	Chinese	1997	Yes
27	F	Chinese	1997	Yes
28	M	Chinese	1997	Yes
29	F	Chinese	1997	Yes
30	M	Chinese	1996	Yes

## Sheet: HPA
Participant No.	Skin T1B	Skin T0	Skin T5	Skin T5A	Body T1B	Body T0	Body T5	Body T5A	VAS Sense	VAS Heat
1	33.1	32.2	33.4	32.5	36.6	36.2	36.2	36.4	5	1
2	34.4	34.1	34.3	33.7	36.7	36.1	36.3	36.6	6	1
3	34.9	34.4	35.2	34.6	37.1	35.3	36	36.4	10	1
4	33.6	33.9	33.9	33.7	36.5	36	36.3	35.9	6	1
5	32.9	33.1	33.1	32.8	35.7	35.9	35.3	35.7	3	3
6	35.2	35.4	35.3	35	35.8	36	36.3	36.3	4	3
7	33.9	34.3	34.5	34	37.4	37.2	37.5	37.5	8	5
8	34.9	34.8	35.6	34.9	36.4	36.5	36.7	36.7	3	1
9	35	33.8	34.9	35.1	35.2	36.5	35.9	35.8	3	1
10	33.9	33.9	35.5	35.3	34.9	34.9	35.6	35.4	8	2
11	34.5	33.9	34.9	34.7	36.9	36.5	36.5	36.6	5	1
12	32.8	32.4	33.3	32.9	36.4	35.7	36.2	36.4	3	1
13	34.4	34.3	34.4	33.8	35.8	35.7	35.8	35.7	3	2
14	31.8	32.7	33.1	32.8	36.1	35.3	35.6	35.6	3	3
15	32.4	33.8	33.9	34.2	35.2	35.5	35.5	35.6	10	4
16	33	32.7	32.7	32.5	35.7	35.6	35.5	35.9	3	2
17	33.7	34	33.7	33.5	36	35.4	35.8	35.3	3	2
18	33.3	33	33.6	33	36.3	36.2	36.5	36.4	3	2
19	32.4	33	34.2	33.7	34.3	35	34.7	35.2	6	1
20	32.9	33.7	33.6	32.7	36	36.1	35.8	35.9	7	4
21	33.9	33.9	34	33.4	36.3	36.3	36.7	36.5	5	1
22	34.6	35	35.1	34.8	36.7	36.3	37.1	36.3	3	1
23	33.2	33.3	33.9	33.5	37	35.9	36.4	36.3	4	3
24	34.1	34.1	34.3	33.6	36.2	35.7	35.9	36	3	2
25	33.2	33.1	33.1	32.7	34.9	35.6	35.3	35.6	5	1
26	34.5	34.3	34.7	34.3	36.9	36.6	36.9	36.7	5	5
27	33.5	33.8	34.3	34	36.1	35.5	35.9	36.1	2	2
28	34.3	34.2	34.2	34.1	34.7	34.8	35.2	34.9	2	3
29	32.4	33.1	33.9	33.6	34.4	35.6	35.9	35.6	6	5
30	35.7	35.7	35.8	35.5	37.2	37.2	37.2	37	7	1

## Sheet: NAHPA
Participant No.	Skin T1B	Skin T0	Skin T5	Skin T5A	Body T1B	Body T0	Body T5	Body T5A	VAS Sense	VAS Heat
1	34.6	34.7	34.9	34.4	37.3	37	37.2	37.2	3	1
2	31.4	32.7	32.9	32.3	35.6	35.6	35.9	35.9	2	1
3	33.3	33.7	33.7	32.9	34.1	33.8	34	35.4	10	1
4	34.1	33.6	33.9	33.9	37.3	36.9	37	37.2	3	2
5	33	33.3	33.6	33.4	35.5	35.2	35.5	35.4	2	1
6	35.1	35	34.7	34.2	37.1	37.2	37.1	37.4	4	3
7	33.4	33.6	34	33.7	36.6	37	36.8	36.7	9	5
8	34.1	35.1	35.2	34.3	34.7	35.5	35.7	35.7	5	5
9	33.9	34.1	34.6	34.9	35.5	35.1	35.6	35.4	8	1
10	34.2	34.4	35.9	35.9	34.8	35.3	35.6	35.7	7	2
11	32.7	33.2	32.4	32.3	35.9	35.9	36.1	35.7	3	2
12	33.2	33.5	33.6	33.4	36.7	36.7	37.1	37.6	2	1
13	34.3	35.1	35.1	34.6	37.1	37	37	36.9	4	2
14	33.6	34	34	33.5	36.6	36.7	36.8	36.7	3	3
15	31.8	31.6	31.7	31.7	36.2	36.5	36.2	35.6	9	3
16	30.6	31.4	31.2	31	35.4	35.3	35.5	35.3	6	2
17	35.1	35.2	35.2	34.8	36.4	36.7	36.8	37	3	2
18	33.5	33.6	33.9	33.2	36	35.8	36	36	1	1
19	32.8	32.9	33.9	33.9	35	35.1	35.3	34.8	3	1
20	34.1	34.3	34.2	34.2	36.7	36.6	36.9	36.6	1	1
21	34	34.8	34.9	34.5	36.7	36.5	36.6	36.6	3	1
22	35	34.3	34.5	34.2	35.1	35	35.7	35.4	2	1
23	34.2	33.9	34	34.1	36.2	36.1	35.9	36.1	4	2
24	32.7	32.6	32.4	32.5	36.1	36.4	36.5	35.9	5	1
25	33.4	34.2	34.1	33.5	36.7	36.6	37.1	35.6	5	2
26	34.3	33.7	34.2	34.8	36.2	36.3	36.1	35.8	5	2
27	34.1	34.1	34.4	34.1	36.3	36.7	36.7	36.5	3	2
28	33.2	33.7	33.3	33.4	35.5	35	35.6	35.4	2	2
29	31.3	31.5	31.6	31.5	34.8	34.9	33.8	34.1	7	3
30	35.2	34.8	34.2	33.8	36.4	35.9	35.9	35.9	7	1

## Sheet: Norm
Participant No.	Skin T1B	Skin T0	Skin T5	Skin T5A	Body T1B	Body T0	Body T5	Body T5A	VAS Sense	VAS Heat
1	34	34.2	34.2	34.1	36	36.4	36.2	36	2	1
2	33.8	34.3	34.1	33.8	36	35.6	36.3	35.8	6	1
3	33.5	33.8	34.2	33.9	35.8	34.5	34.9	33.9	7	1
4	34.6	34.9	34.6	34.7	36.1	35.8	36.5	36.3	1	1
5	33.1	33.8	33.7	33.4	34.4	35.3	35.7	35.1	1	1
6	34.3	33.5	33.8	34.1	36.7	36.7	36.6	36.7	3	2
7	33.1	33.5	33.5	33.3	36	36.1	36	36.5	4	4
8	34.2	34.8	34.6	34.3	35.9	35.4	35.6	35.6	2	2
9	34.3	34.1	35.2	34.9	35.1	34.9	35	35.1	1	1
10	35.5	35.1	36	36.5	35.8	36.1	35.7	36.1	3	2
11	34.2	34.3	34.3	34	36	35.9	36.2	35.9	2	1
12	32.8	32.9	33.1	33.1	36.2	35.6	36	35.9	1	2
13	33.9	34.5	34.5	34.4	35.5	35.4	35.5	35.3	6	2
14	33.8	33.8	33.6	33.1	36.2	35.8	36.1	35.9	2	1
15	32.7	32.5	33.2	33.1	35.5	35.3	35.7	35.4	6	4
16	33.3	34	34.2	33.9	36.6	36.4	36.7	37.3	2	4
17	34.3	34.9	34.6	34.4	36.1	35.4	35.8	35.9	5	5
18	33.5	33.4	33.8	33.3	35.7	35.3	35.9	35.6	5	3
19	33.4	33.6	34	33.7	34.4	34.9	34.5	34.3	4	1
20	34.1	34.5	34.5	34.1	36.2	36	36	35.7	1	1
21	32.9	33.9	34.3	34.3	37.2	37.1	37.2	37.1	3	1
22	34.3	34	33.8	33.4	35.8	35.4	35.5	35.4	1	1
23	31.6	31.4	31.9	31.7	36.2	36.2	36.6	36.1	6	5
24	33.6	33.9	34	33.9	36.4	36.2	36.3	36.2	6	1
25	33.3	33.8	34	33.8	35.9	35.6	36	35.6	2	1
26	33.6	33.8	34	33.7	35.9	35.8	35.9	35.7	3	4
27	33.5	33.2	33.3	33	36.3	35.8	36.4	35.8	2	1
28	34.5	35.1	35.1	35.1	35.6	35.1	35	34.8	2	2
29	34	34	34.5	34.6	34.7	34.4	34.4	34.2	3	2
30	35.3	35.1	34.4	34.1	36.2	36.5	36.2	36.4	4	1

## Sheet: Sham
Participant No.	Skin T1B	Skin T0	Skin T5	Skin T5A	Body T1B	Body T0	Body T5	Body T5A	VAS Sense	VAS Heat
1	34	34.2	33.8	33.3	35.9	36.3	35.7	35.8	1	1
2	33.8	34.6	34.4	34.3	36.7	36.4	37.2	37.1	2	1
3	33.3	33.5	33.4	33.4	35.8	35.3	35.7	35	7	1
4	34	33.8	33.6	34.2	36	36.1	36.5	36.4	1	1
5	33.5	33.9	33.9	33.9	36.3	35.5	36.4	36.5	2	1
6	34.3	34.5	34.6	34.5	36	35.8	36.2	36.1	4	3
7	32.9	33.2	33.1	33	37.3	37.6	37.6	37.6	1	1
8	34.3	34.5	34.6	34.3	35.8	36.5	35.8	35.8	1	1
9	35.3	35.8	36.1	35.8	35.8	35.4	35.8	36.1	1	1
10	33.7	33.8	34.7	35	35.6	35.5	35.4	35.6	1	1
11	35.5	35.5	35	35.1	35.6	35.2	35.6	35.6	1	1
12	31.5	31.9	31.8	31.4	36.6	36.5	36.8	37	1	1
13	33.3	34.2	34.6	34.1	35.9	35.6	35.6	35.8	1	1
14	33.1	33.4	33.2	32.6	35.6	35.3	35.6	35.7	1	1
15	33.8	33.7	33.8	33.7	36.4	36.4	36.3	36.6	1	1
16	32.4	32.9	33.3	33.3	35.3	35.1	35.8	35.3	1	1
17	33.9	34.6	34.8	34.4	36.1	35.5	35.6	35.4	1	1
18	34.1	33.5	33.8	34.1	37.1	36.6	36.6	36.9	1	1
19	33.5	33.6	34	34.3	35.5	35.3	34.8	34.7	1	1
20	34.6	34.2	34.3	34.6	36.2	35.9	36.1	36	1	1
21	34.2	34	34.2	34.1	36.8	36.2	36.9	36.3	1	1
22	33.8	35.2	35.1	35.1	34.6	34.6	34.7	34.6	1	1
23	32	32.2	32.9	33.2	36.1	35.6	35.7	35.7	2	2
24	34.5	34.9	34.8	34.8	37.3	36.8	37.4	37	1	1
25	30.9	31.7	31.3	31.6	34.9	36	35.6	35.3	2	1
26	32.9	33.3	33.6	33.4	35.7	35.6	35.7	35.3	1	1
27	34.6	34.3	33.9	33.8	35.9	35.8	35.9	36	1	1
28	32.9	33.5	33.7	33.7	34.6	34.3	34.5	34.3	1	1
29	33.6	33.6	33	33.1	34.1	35.4	35.4	35.5	1	2
30	34.9	34.4	34.4	34.3	36.1	35.7	36.4	36.3	1	1
